# Supplementary material for: Current trends in patient and public involvement in cancer research: A systematic review
Source: PubMed Central journal article supplement (PMC6351419; doi:10.1111/hex.12841), 2018-10-30
Supplement: HEX-22-3-s001.pdf [file HEX-22-3-s001.pdf]

**Appendix 1:**  
**Quality assessment (CASP and MMAT)**

| CASP Appraisal questions | 1<br>Aim | 2<br>Method | 3<br>Design-aim | 4<br>Recruitment | 5<br>Data collection | 6<br>Researcher-participant relationship | 7<br>Ethics | 8<br>Analysis | 9<br>Findings | 10<br>Value | Notes                                                                                                                 |
|--------------------------|----------|-------------|-----------------|------------------|----------------------|------------------------------------------|-------------|---------------|---------------|-------------|-----------------------------------------------------------------------------------------------------------------------|
| Ashley et al. 2012       | yes      | yes         | yes             | yes              | yes                  | no                                       | yes         | yes           | yes           | yes         |                                                                                                                       |
| Corner et al. 2007       | yes      | yes         | yes             | yes              | yes                  | yes                                      | yes         | yes           | yes           | yes         |                                                                                                                       |
| Ellis et al. 2012        | yes      | yes         | yes             | yes              | yes                  | no                                       | yes         | yes           | yes           | yes         |                                                                                                                       |
| Freysteinson 2010        | yes      | yes         | yes             | yes              | yes                  | no                                       | no          | yes           | yes           | yes         | Author states that it is a case study                                                                                 |
| Islam et al. 2014        | yes      | yes         | yes             | yes              | yes                  | no                                       | no          | yes           | yes           | yes         |                                                                                                                       |
| MacCarrier et al. 2016   | yes      | yes         | yes             | yes              | yes                  | no                                       | no          | yes           | yes           | yes         | Minimal description of ethics                                                                                         |
| Perkins et al. 2007      | yes      | yes         | yes             | yes              | yes                  | yes                                      | yes         | yes           | yes           | yes         | This study describes the qualitative study that led to the development of a questionnaire study (Perkins et al. 2008) |
| Rush et al. 2015         | yes      | CT          | yes             | CT               | yes                  | yes                                      | no          | no            | no            | yes         |                                                                                                                       |
| Sperling et al. 2017     | yes      | yes         | yes             | yes              | yes                  | yes                                      | yes         | no            | yes           | no          |                                                                                                                       |
| Taylor et al. 2015       | yes      | yes         | yes             | no               | yes                  | no                                       | yes         | yes           | yes           | yes         | Workshop related to Taylor 2016                                                                                       |
| Taylor et al. 2016       | yes      | yes         | yes             | no               | yes                  | no                                       | no          | no            | no            | yes         | Workshop - related to Taylor 2015                                                                                     |
| Treiman et al. 2016      | yes      | yes         | yes             | yes              | yes                  | yes                                      | yes         | no            | yes           | yes         | Patients are both data and partners                                                                                   |
| Wells et al. 2012        | yes      | yes         | yes             | yes              | yes                  | no                                       | yes         | yes           | yes           | yes         |                                                                                                                       |

| MMAT appraisal (mixed studies) | Screening questions |                  | Qualitative studies (question 1.1-1.4) |          |         |                       | Quantitative descriptive studies (question 4.1-4.4) |                         |              |               | Notes                                                                                                               |
|--------------------------------|---------------------|------------------|----------------------------------------|----------|---------|-----------------------|-----------------------------------------------------|-------------------------|--------------|---------------|---------------------------------------------------------------------------------------------------------------------|
|                                | Research objective  | Design-objective | Data source                            | Analysis | Context | Researchers influence | Sample strategy                                     | Sample representativity | Measurements | Response Rate |                                                                                                                     |
| Dellson et al. 2010            | yes                 | yes              | yes                                    | yes      | yes     | no                    | yes                                                 | no                      | yes          | yes           | Participants are proactive patient advocates                                                                        |
| Fleisher et al. 2014           | yes                 | yes              | yes                                    | no       | yes     | yes                   | yes                                                 | no                      | yes          | yes           |                                                                                                                     |
| Clinton-Macharg et al. 2010    | yes                 | yes              |                                        |          |         |                       | yes                                                 | yes                     | yes          | no            |                                                                                                                     |
| Moorcraft et al. 2016          | yes                 | yes              |                                        |          |         |                       | yes                                                 | yes                     | no           | CT            | Unclear who defined the 12 research areas that were prioritised. 780 patients participated/response rate unreported |
| Perkins et al. 2008            | yes                 | yes              |                                        |          |         |                       | yes                                                 | yes                     | yes          | CT            | This article is related to Perkins et al. 2007 - focuses on survey results                                          |
| Chiu et al. 2013               | yes                 | yes              | yes                                    | yes      | yes     | yes                   | yes                                                 | yes                     | yes          | yes           |                                                                                                                     |
| Dear et al. 2011               | yes                 | yes              | CT                                     | CT       | no      | no                    | no                                                  | CT                      | yes          | no            | Difficult to make appraisal, uses consumer reference group                                                          |
| van Merode et al. 2016         | yes                 | yes              | Yes                                    | no       | yes     | no                    | yes                                                 | yes                     | yes          | no            |                                                                                                                     |
| MacNair et al. 2016            | yes                 | yes              | Yes                                    | yes      | yes     | yes                   | yes                                                 | yes                     | yes          | yes           |                                                                                                                     |
| Vargas et al. 2014             | CT                  | CT               | CT                                     | CT       | yes     | CT                    | CT                                                  | CT                      | CT           | CT            | Difficult to make appraisal due to community partnered-participatory research process                               |
| Wan et al. 2016                | yes                 | yes              | Yes                                    | yes      | yes     | no                    | yes                                                 | no                      | yes          | CT            | James Lind Alliance process                                                                                         |
| Vivat et al. 2012              | yes                 | yes              | Yes                                    | yes      | yes     | CT                    | yes                                                 | yes                     | yes          | CT            |                                                                                                                     |
| Saunders et al. 2012           | yes                 | yes              | Yes                                    | yes      | yes     | yes                   | yes                                                 | CT                      | yes          | no            |                                                                                                                     |
| Stephens et al. 2015           | yes                 | yes              |                                        |          |         |                       | yes                                                 | CT                      | yes          | no            | James Lind Alliance process                                                                                         |

Abbreviation:  
CT= Cannot tell
